# Supplementary material
Source: PubMed Central journal article supplement (PMC4043367)
Supplement: Supp_Fig1.pdf [file Supp_Fig1.pdf]

## Supplementary Data

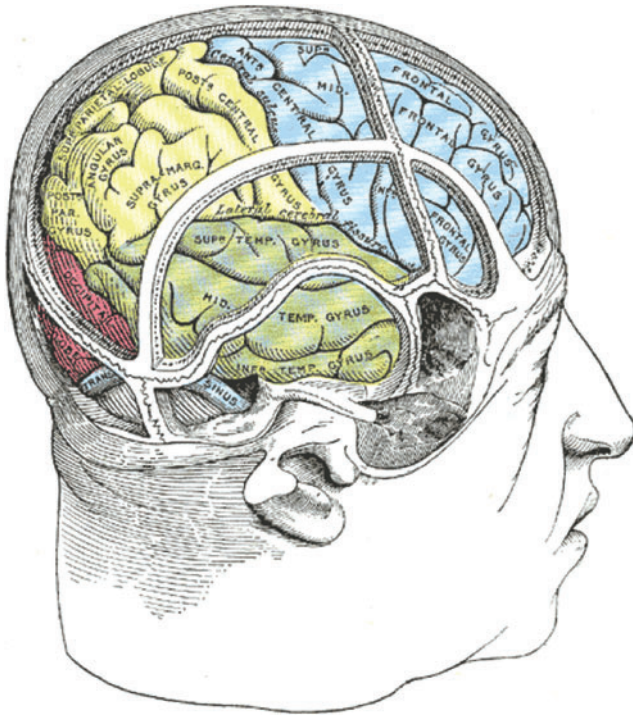

**SUPPLEMENTARY FIG. S1.** Approximate locations of surface brain cortex areas in relation to bone suture lines and extracranial landmarks on the skull (reproduction of a lithograph, Gray 1197.png). In the present study, the 5.35 cm diameter LED cluster heads were placed on the forehead and scalp areas based on these surface landmarks. Source: *Gray's Anatomy of the Human Body* (originally published in 1918) is now in the public domain; permission to reprint is not required.
