# Supplementary material
Source: PubMed Central journal article supplement (PMC4043367)
Supplement: Supp_Fig2.pdf [file Supp_Fig2.pdf]

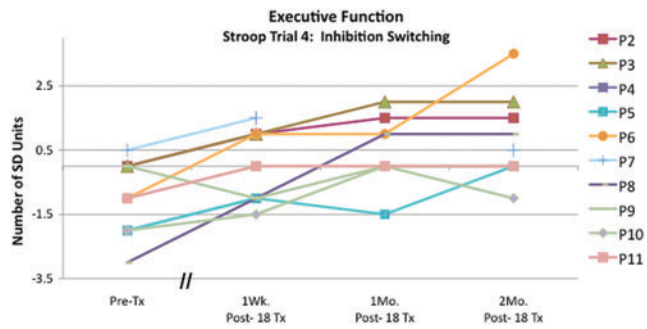

**SUPPLEMENTARY FIG. S2.** Executive Function, Stroop Trial 4 inhibition switching: Graph showing pre- and post-LED test scores for each participant (SD adjusted for age and education). P8 was an active duty member of the military with an improvised explosive device (IED) blast traumatic brain injury (TBI) (and other mild TBIs [mTBIs]) 3 years before entry. He was treated with transcranial LED and then returned for further evaluation by his unit.
