# Supplementary material
Source: PubMed Central journal article supplement (PMC4043367)
Supplement: Supp_Fig4.pdf [file Supp_Fig4.pdf]

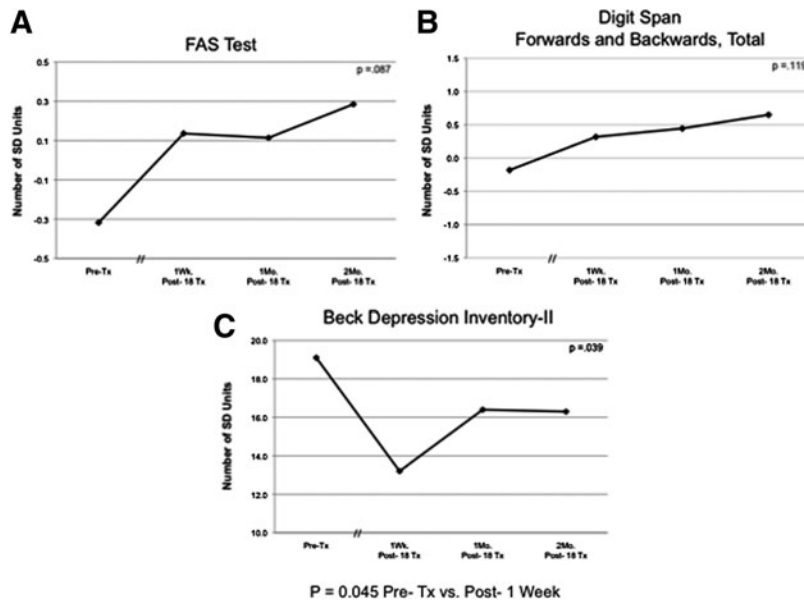

**SUPPLEMENTARY FIG. S4.** Graphs for two additional NP tests and one psychological measure. There was no significant trend over time for the NP tests. (A) FAS Test ( $p = .087$ ) and (B) Digital Span, Forwards and Backwards, Total ( $p = .119$ ). There was a trend toward significant improvement on the psychological measure for depression (BDI) at 1 week post—the 18th LED treatment vs. pre-LED ( $p = .045$ ) (C).
